# Supplementary material
Source: publisher figshare collection journal article supplement (https://acs.figshare.com/ndownloader/files/22734863)
Supplement: Supplementary file 1 [file 22734863]

Supporting information prepared for publication in *Environmental Science and Technology*

**Microplastic Fallout in Different Indoor Environments**

Qun Zhang,<sup>†,‡</sup> Yaping Zhao,<sup>‡</sup> Fangni Du,<sup>†</sup> Huiwen Cai,<sup>†</sup> Gehui Wang,<sup>§</sup> Huahong Shi<sup>\*,†</sup>

No. of pages: **2**

No. of figures: **1**

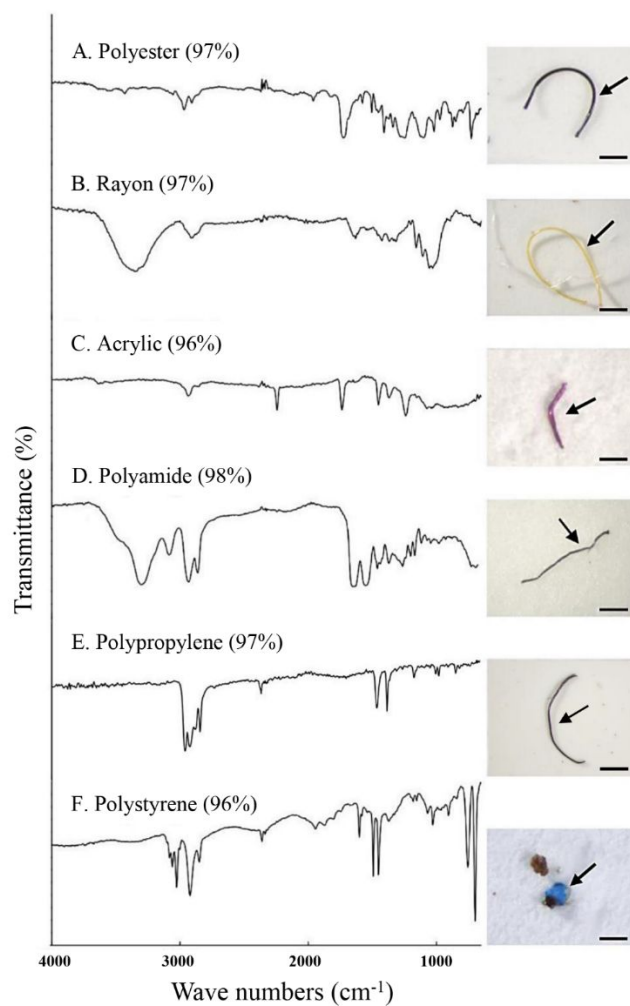

Figure S1. Analysis of microplastics with  $\mu$ -FTIR. The value in the brackets indicates the matches of the spectra with the standards. The black arrows in the photographs indicate the particles that were identified. Scale bar = 0.1 mm.
